# Supplementary material for: Comparative Genomics of Bifidobacterium, Lactobacillus and Related Probiotic Genera
Source: Springer Nature journal article supplement (doi:10.1007/s00248-011-9948-y), 2011-10-26
Supplement: MOESM1 [file 248_2011_9948_MOESM1_ESM.doc]

Supplementary Table S1. Functional description of 63 core genes conserved in all analysed genomes

**SwissProt entry Functional description**

sp|Q59192|PARE_BACSU DNA topoisomerase 4 subunit B

sp|P52329|RPOD_ENTFA RNA polymerase sigma factor rpoD

sp|P46343|PHOL_BACSU PhoH-like protein

sp|Q84BU4|DNAK_LACAC Chaperone protein DnaK

sp|Q5FJN6|IF2_LACAC Translation initiation factor IF-2

sp|Q5FJM5|PYRH_LACAC Uridylate kinase

sp|O07513|HIT_BACSU Protein hit

sp|Q5FIN8|METK_LACAC S-adenosylmethionine synthase

sp|Q5FMJ3|GPMA_LACAC 3-bisphosphoglycerate-dependent phosphoglycerate mutase

sp|P37518|ENGD_BACSU GTP-dependent nucleic acid-binding protein engD

sp|Q5FMI6|SYY_LACAC Tyrosyl-tRNA synthetase

sp|Q9S5Z2|CLPE_LACLM ATP-dependent Clp protease ATP-binding subunit ClpE

sp|Q5FME6|PYRG_LACAC CTP synthase

sp|Q88Z31|FTSH_LACPL ATP-dependent zinc metalloprotease FtsH

sp|Q5FM97|RPOB_LACAC DNA-directed RNA polymerase subunit beta

sp|Q5FM96|RPOC_LACAC DNA-directed RNA polymerase subunit beta'

sp|Q5FJG0|RL27_LACAC 50S ribosomal protein L27

sp|Q5FIW9|RL20_LACAC 50S ribosomal protein L20

sp|Q5FM93|RS7_LACAC 30S ribosomal protein S7

sp|Q5FM86|RS19_LACAC 30S ribosomal protein S19

sp|Q5FM85|RL22_LACAC 50S ribosomal protein L22

sp|Q5FM84|RS3_LACAC 30S ribosomal protein S3

sp|Q5FM83|RL16_LACAC 50S ribosomal protein L16

sp|Q5FM81|RS17_LACAC 30S ribosomal protein S17

sp|Q5FM80|RL14_LACAC 50S ribosomal protein L14

sp|A8YXL6|RL24_LACH4 50S ribosomal protein L24

sp|Q5FM78|RL5_LACAC 50S ribosomal protein L5

sp|Q5FM77|RS8_LACAC 30S ribosomal protein S8

sp|Q5FM76|RL6_LACAC 50S ribosomal protein L6

sp|Q5FM75|RL18_LACAC 50S ribosomal protein L18

sp|Q5FM74|RS5_LACAC 30S ribosomal protein S5

sp|Q5FM72|RL15_LACAC 50S ribosomal protein L15

sp|Q5FM67|RS13_LACAC 30S ribosomal protein S13

sp|Q5FM66|RS11_LACAC 30S ribosomal protein S11

sp|Q5FM23|RL11_LACAC 50S ribosomal protein L11

sp|Q5FM22|RL1_LACAC 50S ribosomal protein L1

sp|Q5FN07|RS18_LACAC 30S ribosomal protein S18

sp|A8YXM7|IF1_LACH4 Translation initiation factor IF-1

sp|Q5FM18|PSTB1_LACAC Phosphate import ATP-binding protein PstB 1

sp|Q5FM04|RECR_LACAC Recombination protein recR

sp|Q93G08|CH10_LACAC 10 kDa chaperonin

sp|Q93G07|CH60_LACAC 60 kDa chaperonin

sp|Q5FLX2|RUVB_LACAC Holliday junction ATP-dependent DNA helicase ruvB

sp|Q5FLT4|SSRP_LACAC SsrA-binding protein

sp|Q5FLL1|GATA_LACAC Glutamyl-tRNA(Gln) amidotransferase subunit A

sp|P27675|GLNQ_GEOSE Glutamine transport ATP-binding protein GlnQ

sp|Q5FLF6|RPIA_LACAC Ribose-5-phosphate isomerase A

sp|Q8DPM2|GYRA_STRR6 DNA gyrase subunit A

sp|Q88V72|FTSK_LACPL DNA translocase ftsK

sp|Q5FL82|RECA_LACAC Protein RecA

sp|Q5FL75|SECA_LACAC Protein translocase subunit secA

sp|Q5FL61|UVRB_LACAC UvrABC system protein B

sp|Q88YI7|UVRA_LACPL UvrABC system protein A

sp|Q5FL46|UNG_LACAC Uracil-DNA glycosylase

sp|P39646|PTAS_BACSU Phosphate acetyltransferase

sp|Q9RGY8|UPP_LACAC Uracil phosphoribosyltransferase

sp|Q5FKY2|ATPA_LACAC ATP synthase subunit alpha

sp|Q5FKY0|ATPB_LACAC ATP synthase subunit beta

sp|Q74JY1|FTSZ_LACJO Cell division protein ftsZ

sp|P37478|YYCF_BACSU Transcriptional regulatory protein yycF

sp|Q5FKR8|EFTU_LACAC Elongation factor Tu

sp|Q5FKL2|METN_LACAC Methionine import ATP-binding protein MetN

sp|Q5FKI6|DTD_LACAC D-tyrosyl-tRNA(Tyr) deacylase
