# Supplementary figures and images for: Comparative Genomics of Bifidobacterium, Lactobacillus and Related Probiotic Genera
Source: PubMed Central journal article supplement — Microb Ecol. 2011 Oct 27;63(3):651–73. doi: 10.1007/s00248-011-9948-y (PMC3324989; doi:10.1007/s00248-011-9948-y), 2011-10-27

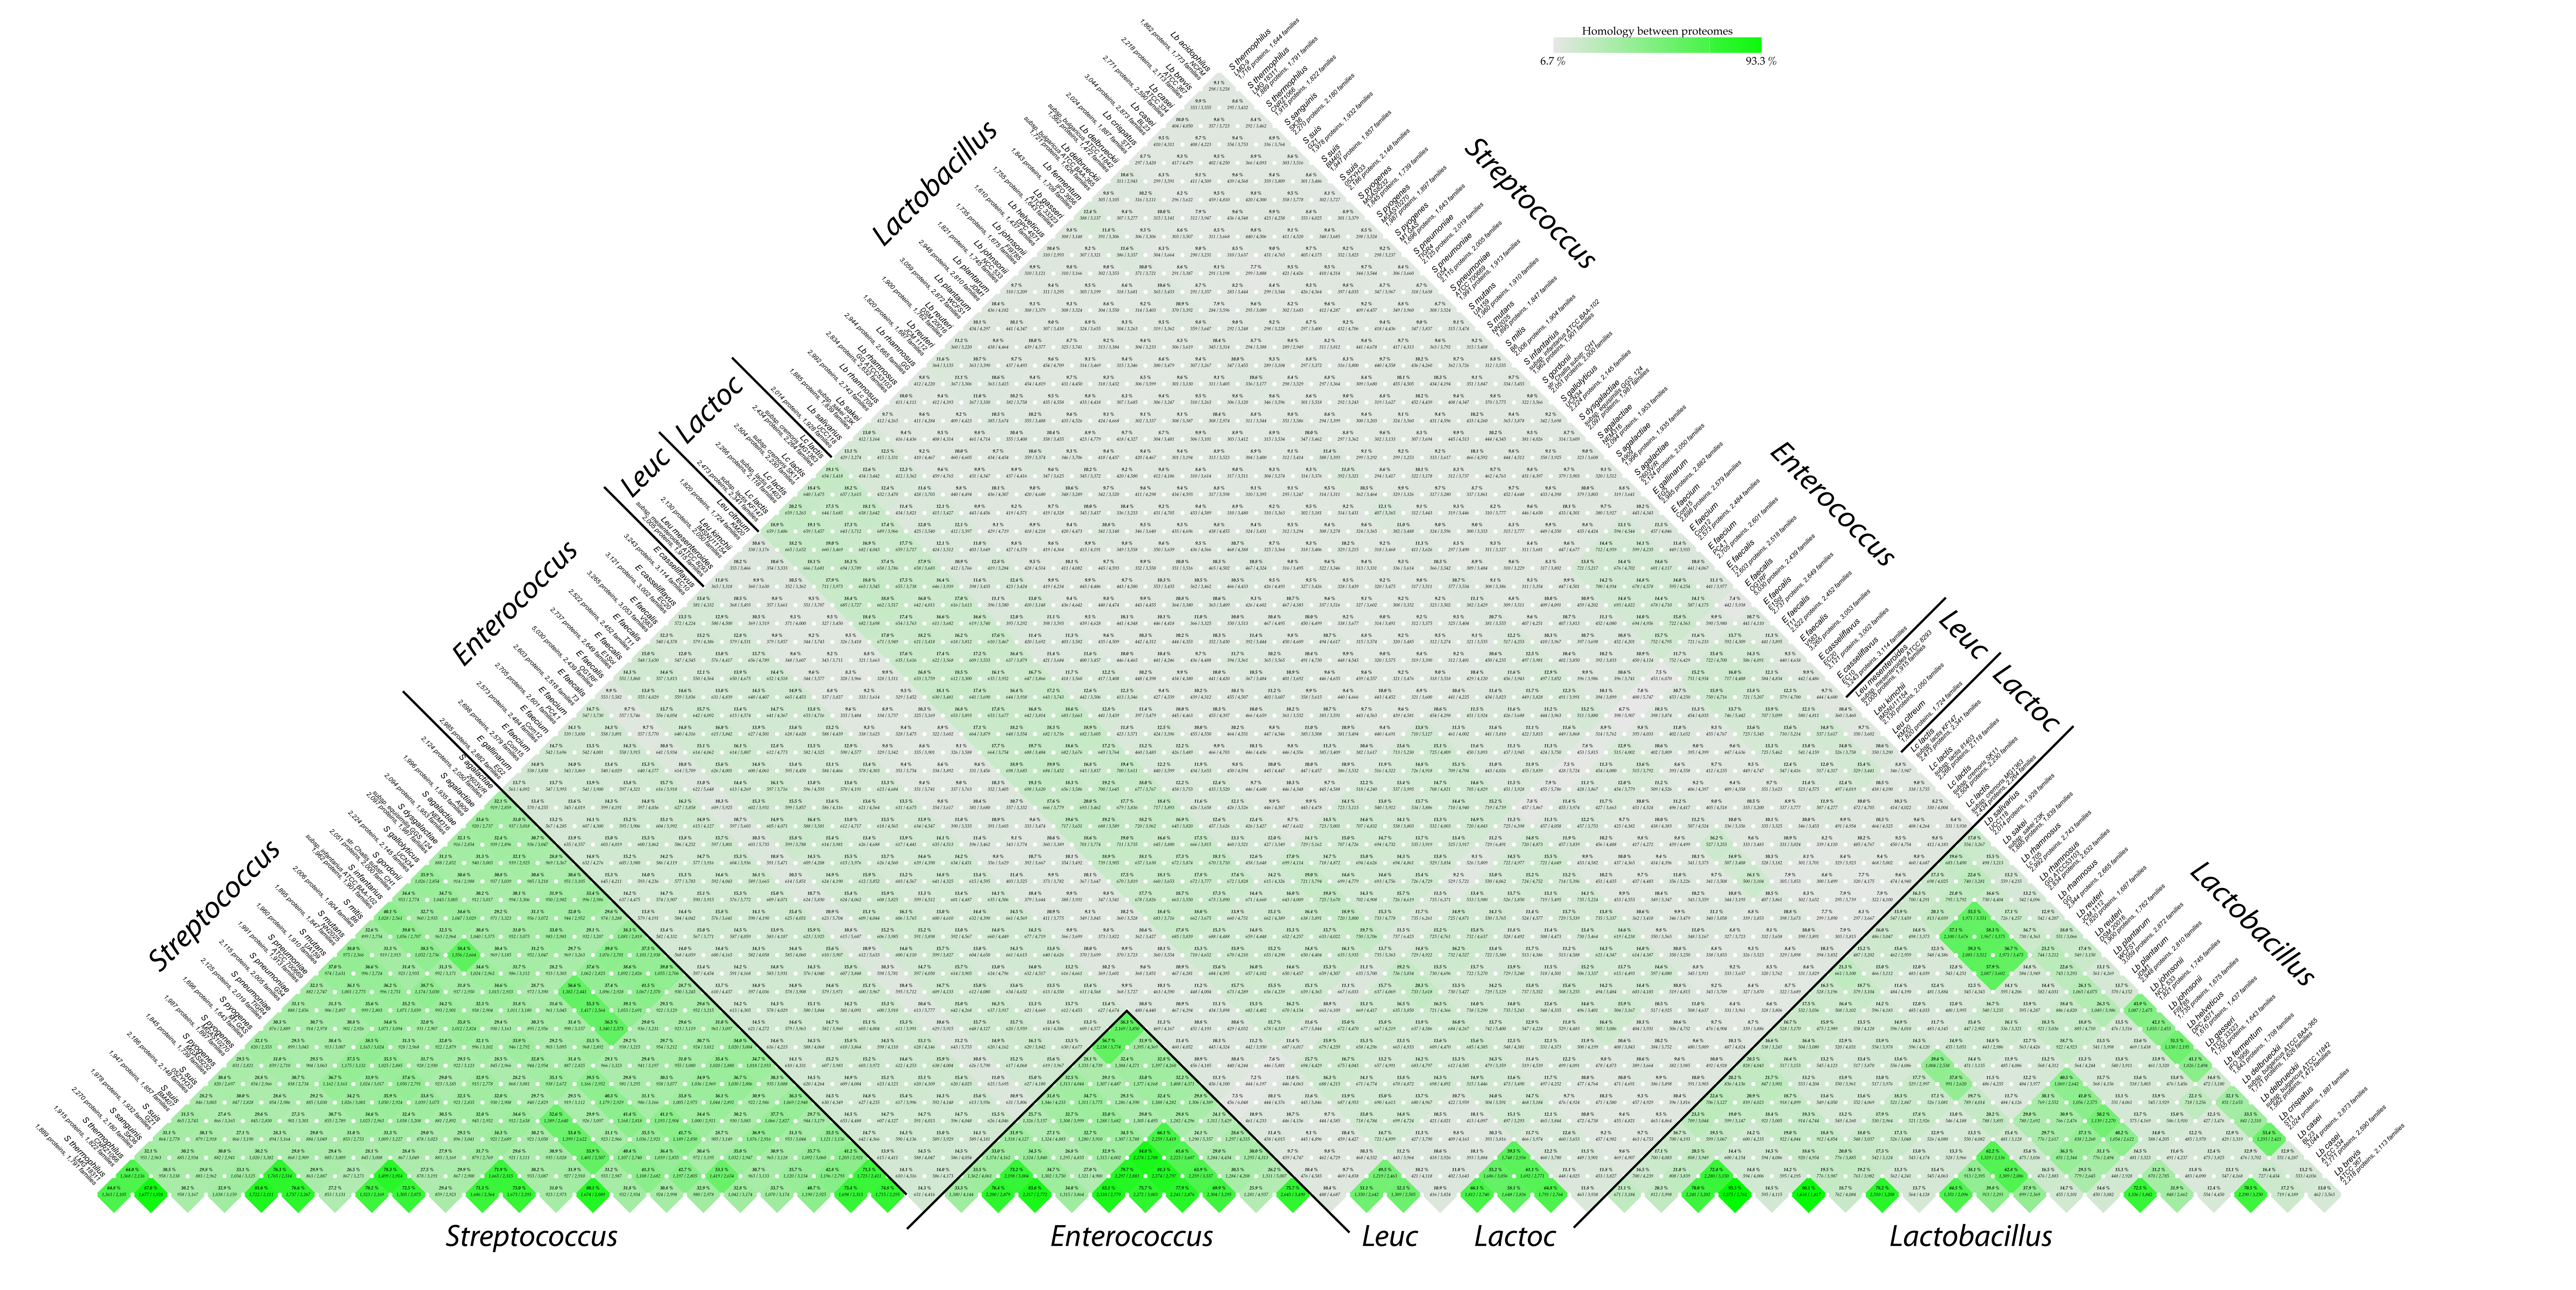

Supplement: 248_2011_9948_MOESM2_ESM.pdf [file 248_2011_9948_MOESM2_ESM.pdf]

**A** MLST genes for *L. plantarum*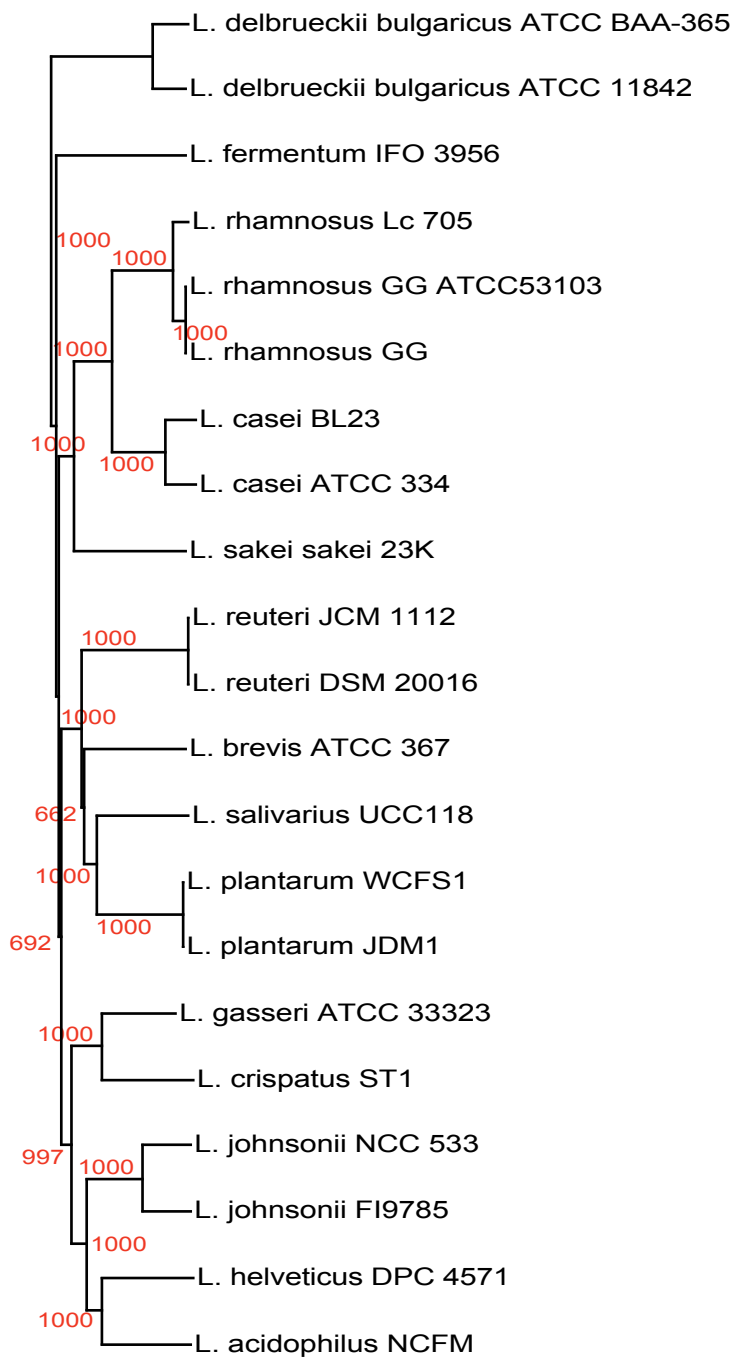**B** MLST genes for *L. casei*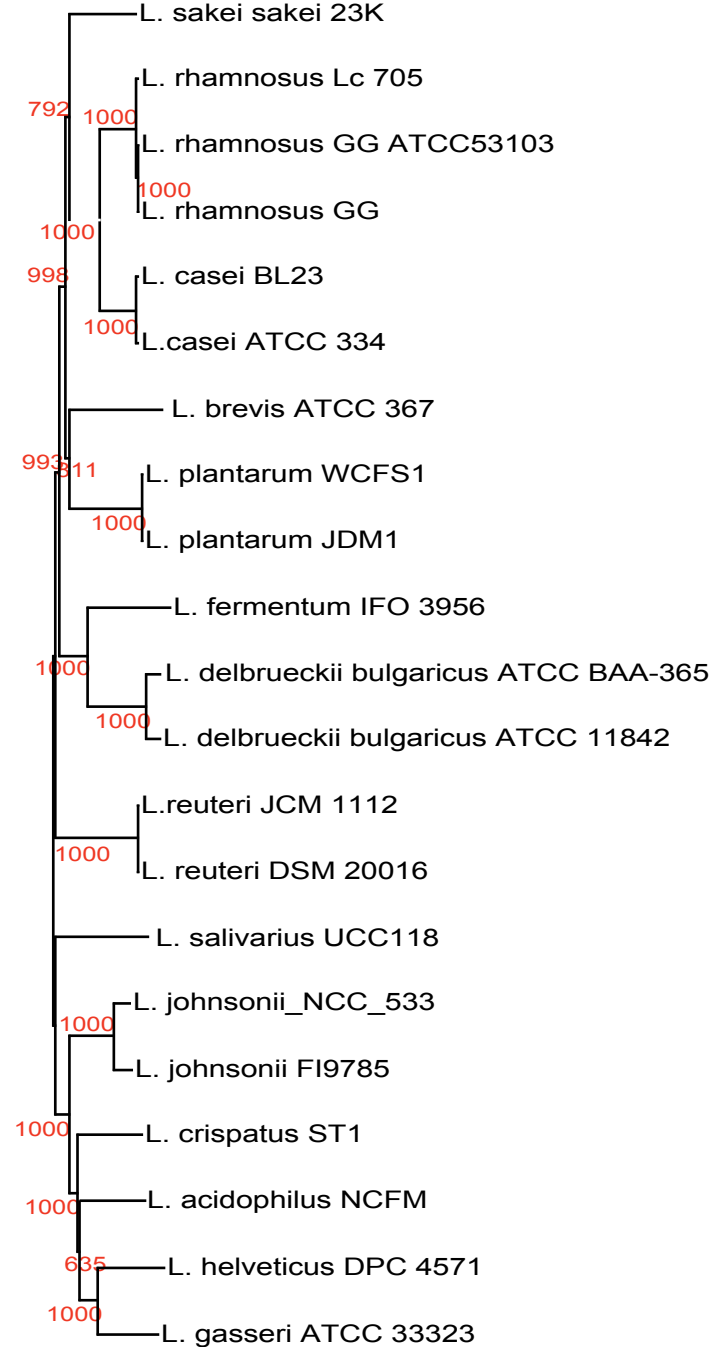**C** MLST genes for *L. sanfranciscensis*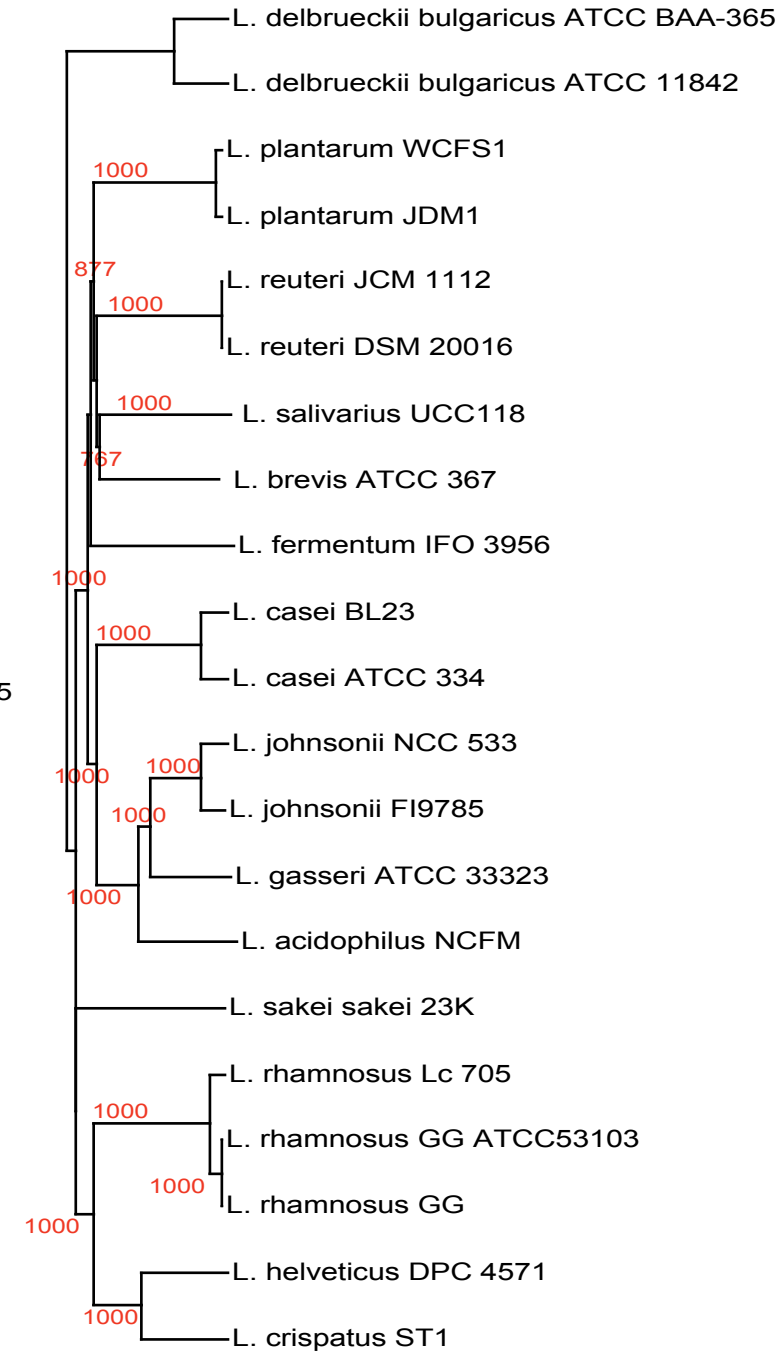

Supplement: 248_2011_9948_MOESM3_ESM.pdf [file 248_2011_9948_MOESM3_ESM.pdf]

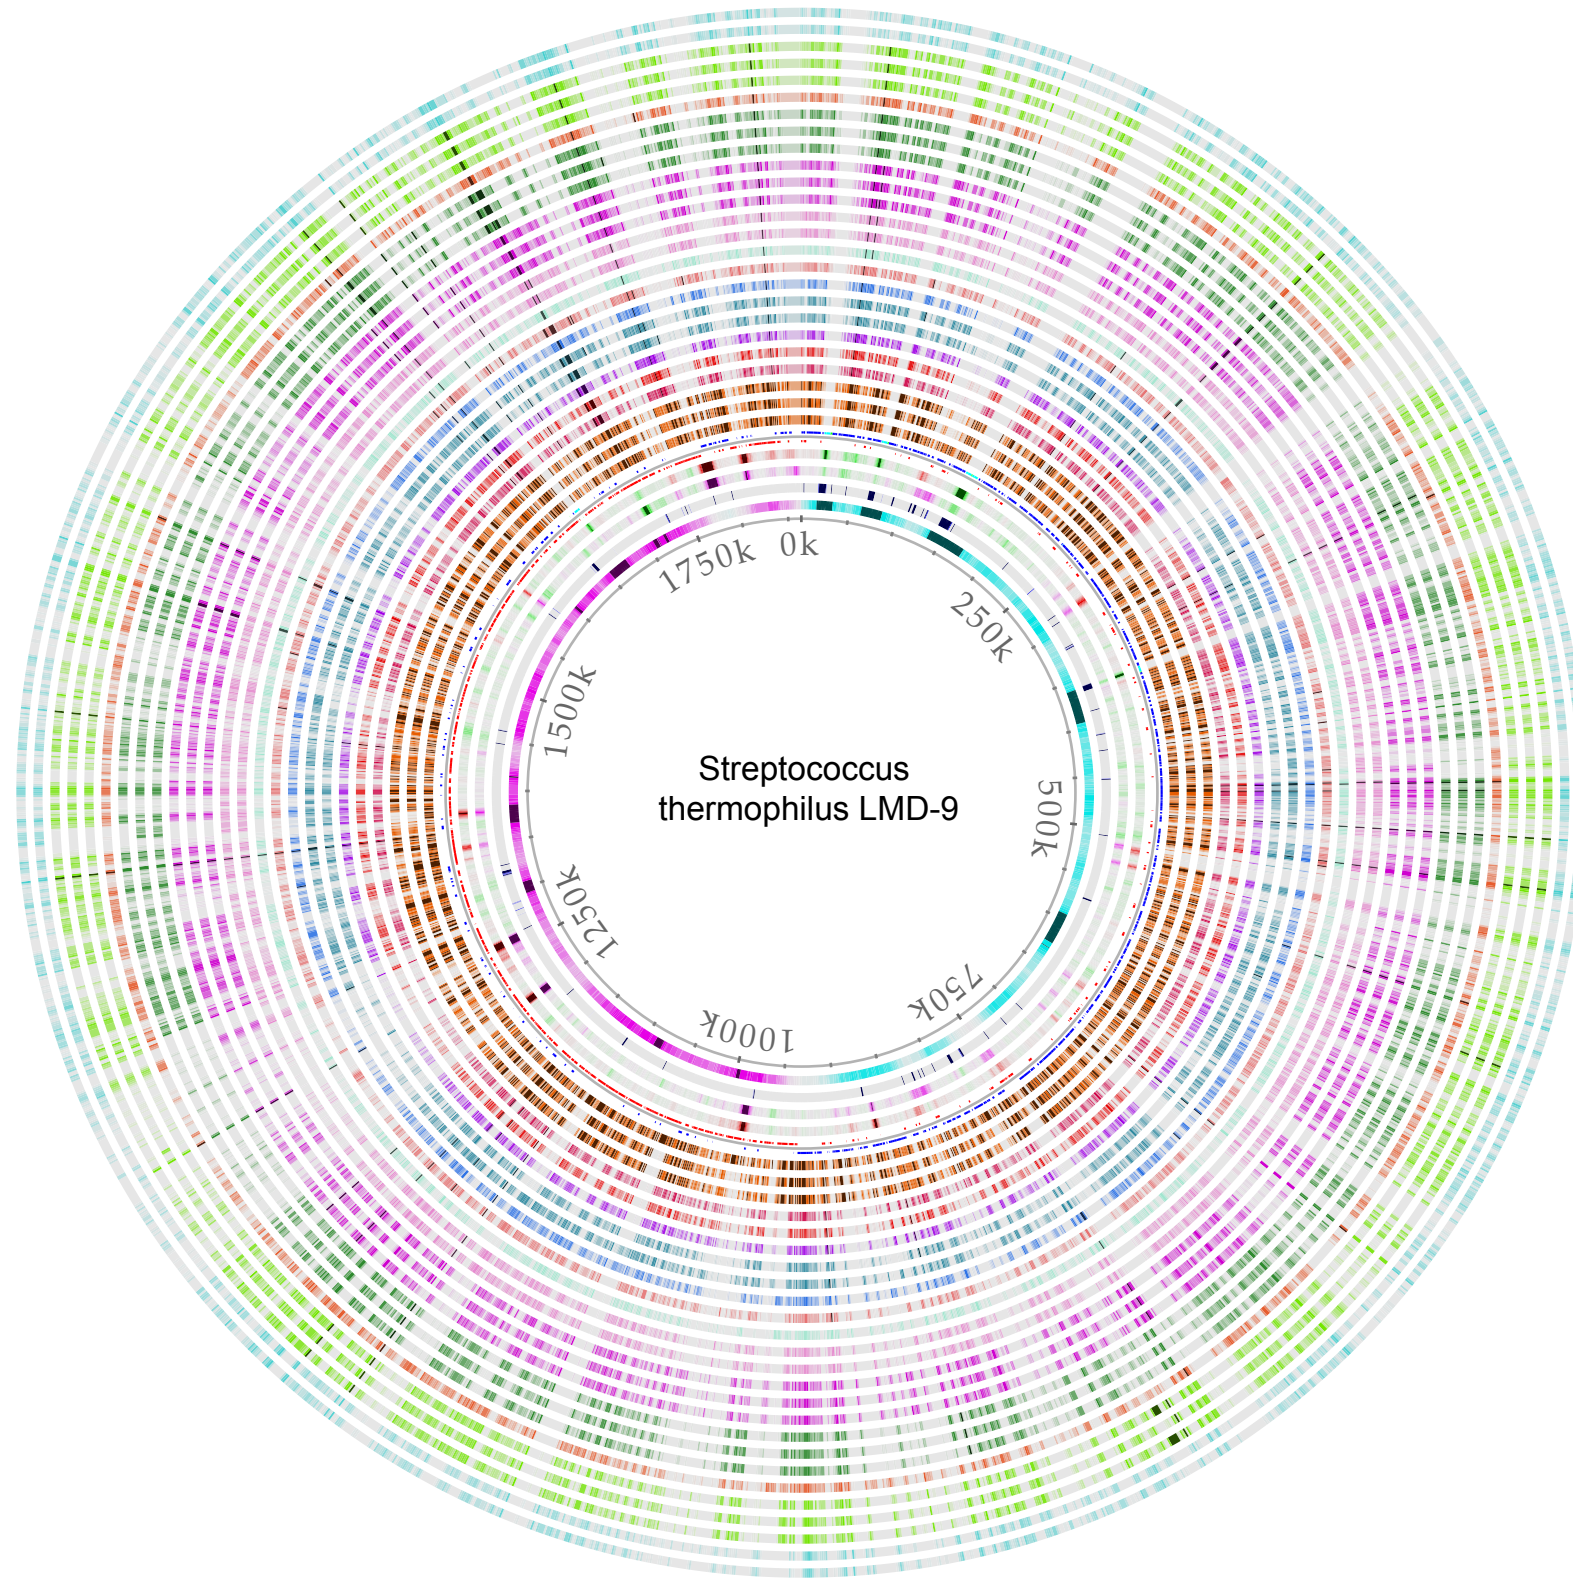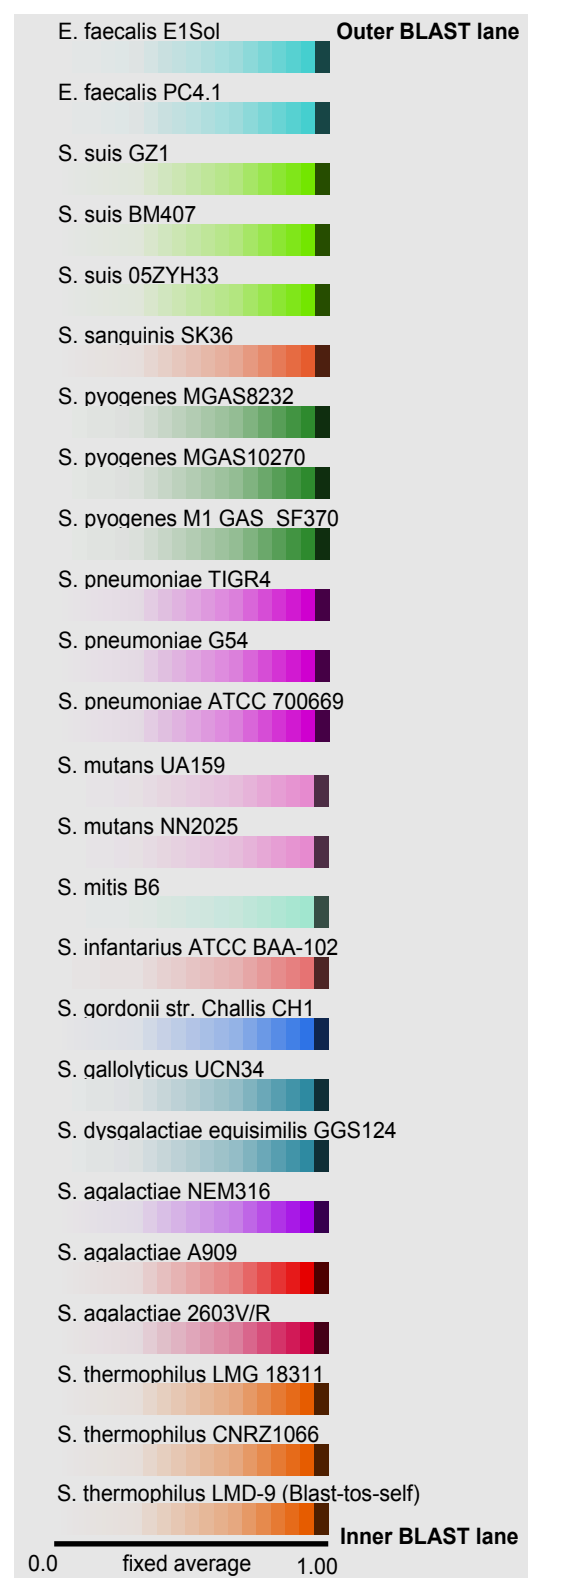

Supplement: 248_2011_9948_MOESM4_ESM.pdf [file 248_2011_9948_MOESM4_ESM.pdf]

### Enterococcus

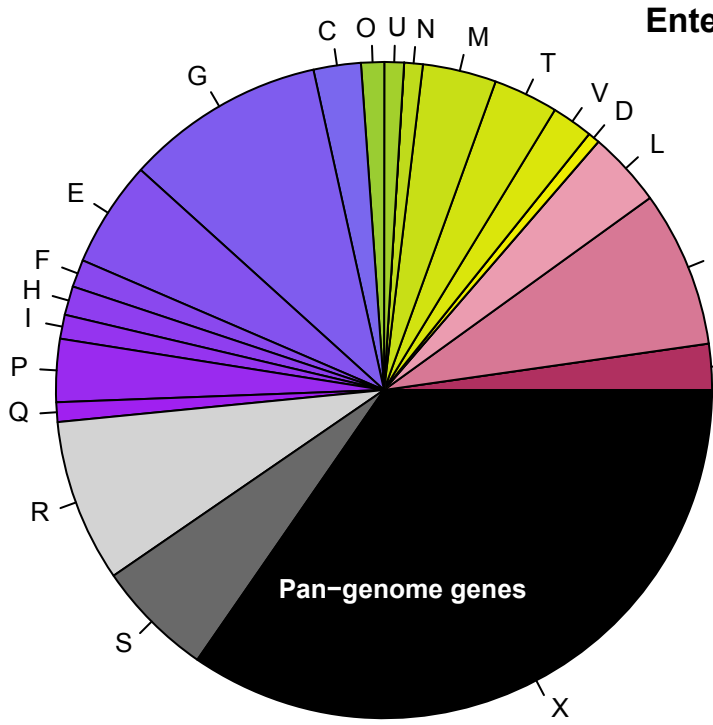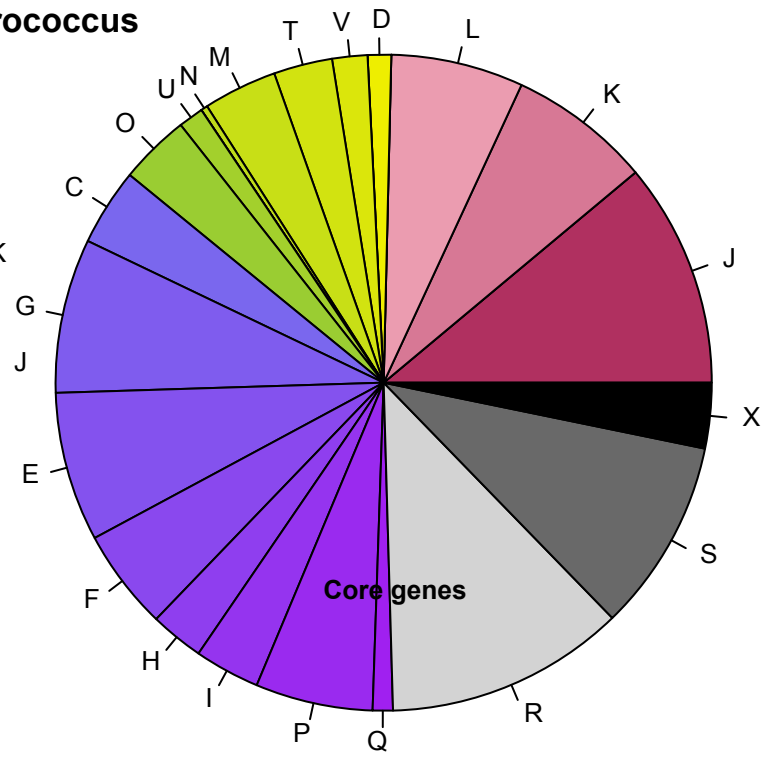

### Streptococcus

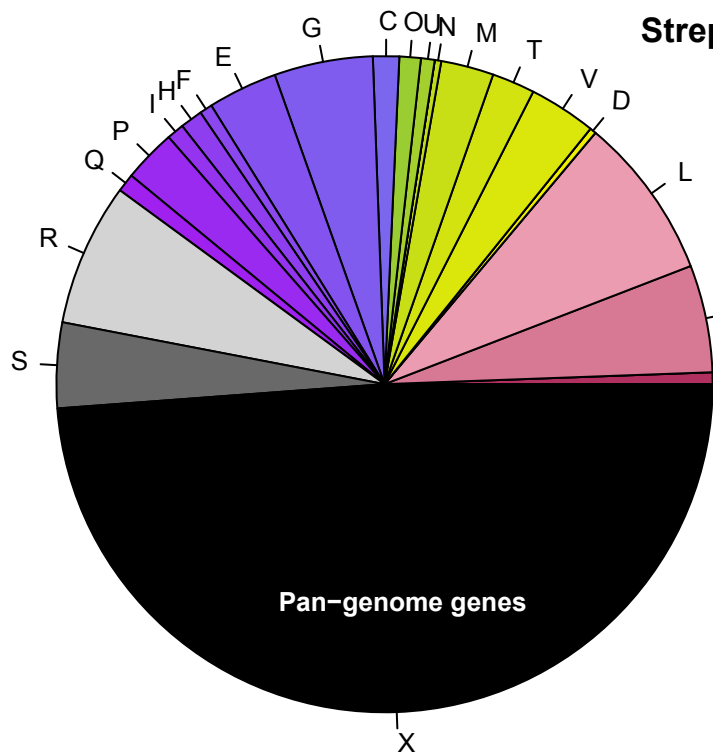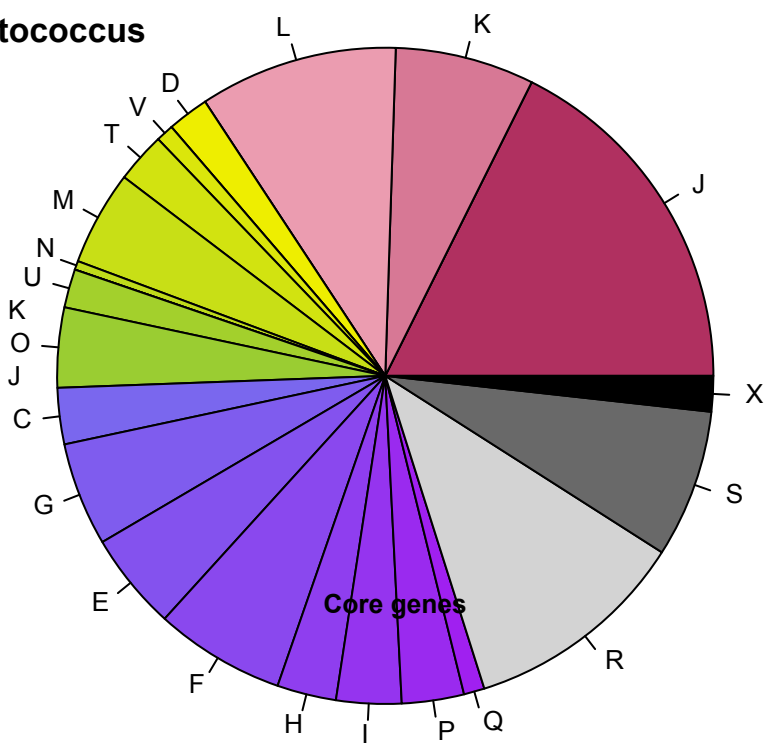

Supplement: 248_2011_9948_MOESM5_ESM.pdf [file 248_2011_9948_MOESM5_ESM.pdf]
